# Supplementary material for: Comparative Genomic Analysis and Characterization of Two Salmonella enterica Serovar Enteritidis Isolates From Poultry With Notably Different Survival Abilities in Egg Whites
Source: Front Microbiol. 2018 Sep 7;9:2111. doi: 10.3389/fmicb.2018.02111 (PMC6137255; doi:10.3389/fmicb.2018.02111)
Supplement: Supplementary file 1 [file Table_1.XLSX]

## Sheet: Table S1
Supplementary table 1 All variations between SJTUF10978 and SJTUF10984
Chr/Pld	Mutation type	Position in SJTUF10984	Positon in SJTUF10978	Nucleotide change	Amino acid change	Gene symbol	Predicted Function	Reads coverage in SJTUF10984	Reads coverage in SJTUF10978
Chr	INDEL	787010	787010-787129	A157_G276ins	V53_T92ins	ybiO	Putative membrane protein	283	205
Chr	INDEL	888169	888289-888372	C2269_G2352ins	P757_Q784ins	ftsK	DNA translocase	144	88
Chr	INDEL	2322726	2322928	C579ins	frameshifted	sseL	Deubiquitinase	334	261
Chr	INDEL	2438153	2438358-2438364	TTGGTAGins	-	-	-	391	284
Chr	INDEL	3181263-3181275	3181475	A23_T35del	frameshifted	yqiJ	Predicted inner membrane protein	360	206
Pld	INDEL	50060	50060	del→T	-	-	-	465	258
Chr	Nonsyn-SNP	130165	130165	T166A	C56S	speD	S-adenosylmethionine decarboxylase	361	223
Chr	Nonsyn-SNP	292071	292071	T535C	S179P	stbE	Fimbrial chaperone protein	287	264
Chr	Nonsyn-SNP	468111	468111	G1427A	G476D	ushA	Bifunctional UDP-sugar hydrolase	306	229
Chr	Nonsyn-SNP	517902	517902	G113T	G38V	fimI	Major pilin protein	287	188
Chr	Nonsyn-SNP	543870	543870	C287G	A96G	ramR	TetR family transcriptional regulator	393	272
Chr	Nonsyn-SNP	750654	750654	A1290T	E430D	hutH	Histidine ammonia-lyase	263	180
Chr	Nonsyn-SNP	755490	755490	T433G	S145A	bioC	Biotin biosynthesis protein	306	195
Chr	Nonsyn-SNP	796584	796704	G775A	A259T	ybiS	L,D-transpeptidase	343	276
Chr	Nonsyn-SNP	974794	974998	G486T	L162F	yccR	Crp/Fnr family transcriptional regulator	310	209
Chr	Nonsyn-SNP	1374428	1374632	A19T	I7F	tpx	Thioredoxin-dependent thiol peroxidase	314	268
Chr	Nonsyn-SNP	1448771	1448975	T932A	L311H	ydcJ	A putative metal hydrolase	306	259
Chr	Nonsyn-SNP	1450415	1450619	C1184T	A395V	SEN1429	Carboxylesterase, type B	343	240
Chr	Nonsyn-SNP	1583901	1584105	A629G	Y210C	dmsA	Dimethyl sulfoxide reductase subunit A	305	215
Chr	Nonsyn-SNP	1658124	1658328	G916A	V306I	cfa	Cyclopropane fatty acyl phospholipid synthase	295	266
Chr	Nonsyn-SNP	1738572	1738776	T562C	Y188H	ydiU	SELO (selenoprotein O) family protein	358	256
Chr	Nonsyn-SNP	1837809	1838013	C140T	A47V	pliC	Periplasmic lysozyme inhibitor of c-type lysozyme	368	266
Chr	Nonsyn-SNP	1945604	1945808	G355T	A119S	ycdX	Hydrolase	343	181
Chr	Nonsyn-SNP	2125011	2125215	T1342C	C448R	cpsG	Phosphomannomutase	197	159
Chr	Nonsyn-SNP	2266407	2266611	A603G	I201M	yejM	Sulfatase	239	210
Chr	Nonsyn-SNP	2327536	2327741	T79A	C27S	yfaX	Transcriptional regulator	388	272
Chr	Nonsyn-SNP	2342545	2342750	T484C	X162Q	menH	2-succinyl-6-hydroxy-2,4-cyclohexadiene-1-carboxylate (SHCHC) synthase	263	170
Chr	Nonsyn-SNP	2580315	2580527	C1477T	Q493X	ratA	Outer membrane protein	268	186
Chr	Nonsyn-SNP	2695361	2695573	G455A	S152N	SEN2589	Gluconolactonase	357	208
Chr	Nonsyn-SNP	2945210	2945422	C907T	L303F	sdaB	L-serine deaminase II	318	230
Chr	Nonsyn-SNP	3473022	3473221	C847G	Q283E	envZ	Osmolarity sensor protein	292	208
Chr	Nonsyn-SNP	3539345	3539544	T382C	C128R	ugpE	Glycerol-3-phosphate transporter membrane protein	259	178
Chr	Nonsyn-SNP	3715168	3715367	C1249A	Q417K	envC	Murein hydrolase(AmiB) activator	322	217
Chr	Nonsyn-SNP	3811869	3812068	C614T	P205L	dsdX	D-serine permease	207	224
Chr	Nonsyn-SNP	3937210	3937409	T338C	L113P	wecD	TDP-fucosamine acetyltransferase	337	259
Chr	Nonsyn-SNP	4302299	4302498	A1583G	E528G	actP	Acetate permease	382	258
Chr	Nonsyn-SNP	4370524	4370723	A229C	M77L	sugE	Quaternary ammonium compound-resistance protein; multidrug efflux system protein	334	253
Chr	Nonsyn-SNP	4393267	4393466	G931A	V311I	miaA	tRNA delta(2)-isopentenylpyrophosphate transferase	338	257
Chr	Nonsyn-SNP	4555968	4556167	T391C	W131R	SEN4302	Phosphotransferase enzyme II C component	316	260
Pld	Nonsyn-SNP	17649	17649	T541G	S181A	rsdB	Resolvase	256	197
Chr	Syn-SNP	176402	176402	T220C	L74L	yadS	Putative inner membrane protein	274	218
Chr	Syn-SNP	377353	377353	C223T	L75L	secF	Protein-export membrane protein SecF	323	232
Chr	Syn-SNP	855551	855671	T246C	G82G	ybjR	N-acetylmuramoyl-L-alanine amidase	275	173
Chr	Syn-SNP	1525238	1525442	G591A	L197L	SEN1495	Malto-oligosyltrehalose trehalohydrolase	335	234
Chr	Syn-SNP	1654972	1655176	C630T	T210T	ydhB	LysR-family transcriptional regulator YdhB	336	225
Chr	Syn-SNP	1937664	1937868	G897T	S299S	ymdC	Cardiolipin synthetase	365	237
Chr	Syn-SNP	2023488	2023692	T273C	S91S	ywqK	FIG01057005: hypothetical protein	311	211
Chr	Syn-SNP	2172206	2172410	C882T	G294G	fbaB	Fructose-bisphosphate aldolase class I	285	205
Chr	Syn-SNP	2385879	2386084	T507C	N169N	yfcD	Putative Nudix hydrolase YfcD	336	268
Chr	Syn-SNP	2606464	2606676	C423T	A141A	yfaS	Alpha-2-macroglobulin	307	234
Chr	Syn-SNP	2623918	2624130	C522T	R174R	rcnA	putative membrane protein	328	206
Chr	Syn-SNP	2852468	2852680	G36A	A12A	spaP	Type III secretion inner membrane protein	337	227
Chr	Syn-SNP	3315403	3315602	T1155C	G385G	gltD	Glutamate synthase [NADPH] small chain	357	203
Chr	Syn-SNP	3349038	3349237	C501T	A167A	qseA	LysR family transcriptional regulator QseA	203	196
Chr	Syn-SNP	3593917	3594116	C510T	T170T	tldD	Putative regulator	256	191
Chr	Syn-SNP	3615873	3616072	A1950G	V650V	bcsA	Cellulose synthase catalytic subunit [UDP-forming]	323	224
Chr	Syn-SNP	4074619	4074818	A612C	A204A	pfkA	6-phosphofructokinase	347	244
Chr	Syn-SNP	4229549	4229748	G948A	L316L	lysC	Aspartokinase	292	227
Chr	Inter-SNP	28847	28847	A→T	-	-	-	285	226
Chr	Inter-SNP	269064	269064	A→G	-	-	-	353	239
Chr	Inter-SNP	290903	290903	C→T	-	-	-	364	278
Chr	Inter-SNP	441846	441846	G→A	-	-	-	391	253
Chr	Inter-SNP	527203	527203	T→C	-	-	-	290	227
Chr	Inter-SNP	807067	807187	C→T	-	-	-	364	250
Chr	Inter-SNP	830616	830736	T→C	-	-	-	399	289
Chr	Inter-SNP	1101671	1101875	T→C	-	-	-	317	211
Chr	Inter-SNP	1800872	1801076	G→T	-	-	-	351	233
Chr	Inter-SNP	2434352	2434557	A→C	-	-	-	376	248
Chr	Inter-SNP	2438436	2438648	T→G	-	-	-	341	232
Chr	Inter-SNP	2632450	2632662	A→G	-	-	-	385	242
Chr	Inter-SNP	2837519	2837731	G→C	-	-	-	412	251
Chr	Inter-SNP	4085110	4085309	A→T	-	-	-	353	209
Chr	Inter-SNP	4205387	4205586	C→G	-	-	-	307	193
Chr	Inter-SNP	4228410	4228609	A→G	-	-	-	458	278
Chr	Inter-SNP	4514576	4514775	A→C	-	-	-	299	256
Chr	Inter-SNP	4646285	4646484	G→A	-	-	-	389	255
