# Supplementary material for: Comparative Genomic Analysis and Characterization of Two Salmonella enterica Serovar Enteritidis Isolates From Poultry With Notably Different Survival Abilities in Egg Whites
Source: Front Microbiol. 2018 Sep 7;9:2111. doi: 10.3389/fmicb.2018.02111 (PMC6137255; doi:10.3389/fmicb.2018.02111)
Supplement: Supplementary file 2 [file Table_2.XLSX]

## Sheet: Table S2
Supplementary table 2 Prediction of nonsyn-SNP effect on protein function using multi-predictive tools
Function category	Gene symbol	Mutation type	Nucleotide change	Amino acid change	PROVEAN score	PROVEAN Prediction	SNAP2 Score	SNAP2 Prediction	SNAP2 Expected Accuracy	SIFT score	SIFT prediction	PolyPhen-2 score	PolyPhen-2 prediction
Lysozyme inhibition	pliC	Nonsyn-SNP	C140T	A47V	-3.227	Deleterious	-44	Neutral	0.72	0.42	Tolerate	0	Benign
Vitamin biosynthesis	ushA	Nonsyn-SNP	G1427A	G476D	-2.477	Neutral	-46	Neutral	0.72	0.08	Tolerate	0.133	Benign
	bioC	Nonsyn-SNP	T433G	S145A	-2.902	Deleterious	50	Effect	0.75	0	Affect protein function	0.979	Probably damaging
	menH	Nonsyn-SNP	T484C	X162Q	NA	NA	NA	NA	NA	NA	NA	NA	NA
Cell division and DNA damage response	ftsK	INDEL	C2269_G2352ins	P757_Q784ins	NA	NA	NA	NA	NA	NA	NA	NA	NA
	yqiJ	INDEL	A23_T35del	frameshifted	NA	NA	NA	NA	NA	NA	NA	NA	NA
	envC	Nonsyn-SNP	C1249A	Q417K	-1.421	Neutral	-50	Neutral	0.72	0.39	Tolerate	0.004	Benign
Osmotic and oxidative protection	ybiO	INDEL	A157_G276ins	V53_T92ins	NA	NA	NA	NA	NA	NA	NA	NA	NA
	envZ	Nonsyn-SNP	C847G	Q283E	-2.906	Deleterious	7	Effect	0.53	0	Affect protein function	0.118	Benign
	tpx	Nonsyn-SNP	A19T	I7F	-0.406	Neutral	-46	Neutral	0.72	0.63	Tolerate	0	Benign
	yccR	Nonsyn-SNP	G486T	L162F	0.085	Neutral	-74	Neutral	0.87	0.19	Tolerate	0.015	Benign
Iron-related function	ydiU	Nonsyn-SNP	T562C	Y188H	-3.263	Deleterious	-76	Neutral	0.87	0.09	Tolerate	0.002	Benign
	sdaB	Nonsyn-SNP	C907T	L303F	-5.248	Deleterious	-95	Neutral	0.97	0.96	Tolerate	0	Benign
	dmsA	Nonsyn-SNP	A629G	Y210C	-7.292	Deleterious	36	Effect	0.66	0	Affect protein function	0.494	Possibly damaging
	cfa	Nonsyn-SNP	G916A	V306I	-0.477	Neutral	-90	Neutral	0.93	0.36	Tolerate	0	Benign
	miaA	Nonsyn-SNP	G931A	V311I	0.097	Neutral	-88	Neutral	0.93	0.55	Tolerate	0	Benign
Maintenance of cell envelope structure	wecD	Nonsyn-SNP	T338C	L113P	-10	Deleterious	-59	Neutral	0.78	1	Tolerate	0	Benign
	fimI	Nonsyn-SNP	G113T	G38V	-2.356	Neutral	59	Effect	0.75	0.14	Tolerate	0.945	Possibly damaging
	stbE	Nonsyn-SNP	T535C	S179P	-6.442	Deleterious	-66	Neutral	0.82	1	Tolerate	0.006	Benign
	yejM	Nonsyn-SNP	A603G	I201M	-3.856	Deleterious	-96	Neutral	0.97	1	Tolerate	0	Benign
	ybiS	Nonsyn-SNP	G775A	A259T	-3.236	Deleterious	-99	Neutral	0.97	0.8	Tolerate	0	Benign
	ycdX	Nonsyn-SNP	G355T	A119S	0.74	Neutral	-86	Neutral	0.93	0.54	Tolerate	0.002	Benign
	yfaX	Nonsyn-SNP	T79A	C27S	-2.769	Deleterious	-50	Neutral	0.72	1	Tolerate	0	Benign
	cpsG	Nonsyn-SNP	T1342C	C448R	-2.117	Neutral	-95	Neutral	0.97	0.57	Tolerate	0	Benign
Amino acid and carbohydrate metabolism	speD	Nonsyn-SNP	T166A	C56S	0.228	Neutral	-21	Neutral	0.61	0.37	Tolerate	0.001	Benign
	hutH	Nonsyn-SNP	A1290T	E430D	1.878	Neutral	-97	Neutral	0.97	1	Tolerate	0	Benign
	SEN2589	Nonsyn-SNP	G455A	S152N	-2.539	Deleterious	19	Effect	0.59	0.01	Affect protein function	0.946	Possibly damaging
	dsdX	Nonsyn-SNP	C614T	P205L	-2.177	Neutral	-12	Neutral	0.57	0.66	Tolerate	0	Benign
	ugpE	Nonsyn-SNP	T382C	C128R	-7.814	Deleterious	-50	Neutral	0.72	1	Tolerate	0	Benign
	SEN4302	Nonsyn-SNP	T391C	W131R	-5.18	Deleterious	-48	Neutral	0.72	0.4	Tolerate	0.001	Benign
	actP	Nonsyn-SNP	A1583G	E528G	-0.734	Neutral	-81	Neutral	0.93	0.27	Tolerate	0.008	Benign
Antibiotic resistance	sugE	Nonsyn-SNP	A229C	M77L	-1.636	Neutral	-71	Neutral	0.87	1	Tolerate	0	Benign
	ramR	Nonsyn-SNP	C287G	A96G	-4.764	Deleterious	-94	Neutral	0.97	1	Tolerate	0	Benign
Solitary genes	sseL	INDEL	C579ins	frameshifted	NA	NA	NA	NA	NA	NA	NA	NA	NA
	SEN1428	Nonsyn-SNP	T932A	L311H	-0.213	Neutral	-88	Neutral	0.93	12	Tolerate	0.001	Benign
	SEN1429	Nonsyn-SNP	C1184T	A395V	-0.841	Neutral	-87	Neutral	0.93	1	Tolerate	0.079	Benign
	ratA	Nonsyn-SNP	C1477T	Q493X	NA	NA	NA	NA	NA	NA	NA	NA	NA
	rsdB	Nonsyn-SNP	T541G	S181A	-0.57	Neutral	-92	Neutral	0.97	0.88	Tolerate	0	Benign
		Predicted to affect protein function
	NA	No analysis for INDELs or premature stop codons
	PROVEAN	Variants with a score equal to or below -2.5 are considered "deleterious" whereas variants with a score above -2.5 are considered neutral
	SNAP2	From -100 to 0: neutral; from 0 to 100: effect
	SIFT	Probability <0.05: deleterious
	Polyphen2	The scale of 0.00 (benign) to 1.00 (highly damaging)
